# Supplementary material for: Aluminum fluoride-18 labeled folate enables in vivo detection of atherosclerotic plaque inflammation by positron emission tomography
Source: Sci Rep. 2018 Jun 26;8:9720. doi: 10.1038/s41598-018-27618-4 (PMC6018703; doi:10.1038/s41598-018-27618-4)
Supplement: Supplementary file 1 — Supplemental data set_clean [file 41598_2018_27618_MOESM1_ESM.pdf]

## Supplemental Material

### **Aluminum fluoride-18 labeled folate enables *in vivo* detection of atherosclerotic plaque inflammation by positron emission tomography**

Johanna M. U. Silvola<sup>1</sup>, Xiang-Guo Li<sup>1,2</sup>, Jenni Virta<sup>1</sup>, Päivi Marjamäki<sup>1</sup>, Heidi Liljenbäck<sup>1,3</sup>, Jarkko P. Hytönen<sup>4</sup>, Miikka Tarkia<sup>1</sup>, Virva Saunavaara<sup>5,6</sup>, Saija Hurme<sup>7</sup>, Senthil Palani<sup>1</sup>, Harri Hakovirta<sup>8</sup>, Seppo Ylä-Herttuala<sup>4,9</sup>, Pekka Saukko<sup>10</sup>, Qingshou Chen<sup>11</sup>, Philip S. Low<sup>11</sup>, Juhani Knuuti<sup>1,2,5</sup>, Antti Saraste<sup>1,5,12,13</sup> and Anne Roivainen<sup>1,3,5\*</sup>

<sup>1</sup>Turku PET Centre, University of Turku, Turku, Finland; <sup>2</sup>Turku PET Centre, Åbo Akademi University, Turku, Finland; <sup>3</sup>Turku Center for Disease Modeling, University of Turku, Turku, Finland; <sup>4</sup>A. I. Virtanen Institute for Molecular Sciences, University of Eastern Finland, Kuopio, Finland; <sup>5</sup>Turku PET Centre, Turku University Hospital, Turku, Finland; <sup>6</sup>Department of Medical Physics, Turku University Hospital, Turku, Finland; <sup>7</sup>Department of Biostatistics, University of Turku, Turku, Finland; <sup>8</sup>Department of Vascular Surgery, Turku University Hospital, Turku, Finland; <sup>9</sup>Science Service Center and Gene Therapy Unit, Kuopio University Hospital, Kuopio, Finland; <sup>10</sup>Department of Pathology and Forensic Medicine, University of Turku, Turku, Finland; <sup>11</sup>Department of Chemistry, Purdue University, West Lafayette, Indiana, USA; <sup>12</sup>Heart Center, Turku University Hospital, Turku, Finland; <sup>13</sup>Institute of Clinical Medicine, University of Turku, Turku, Finland

\*Correspondence: [anne.roivainen@utu.fi](mailto:anne.roivainen@utu.fi)

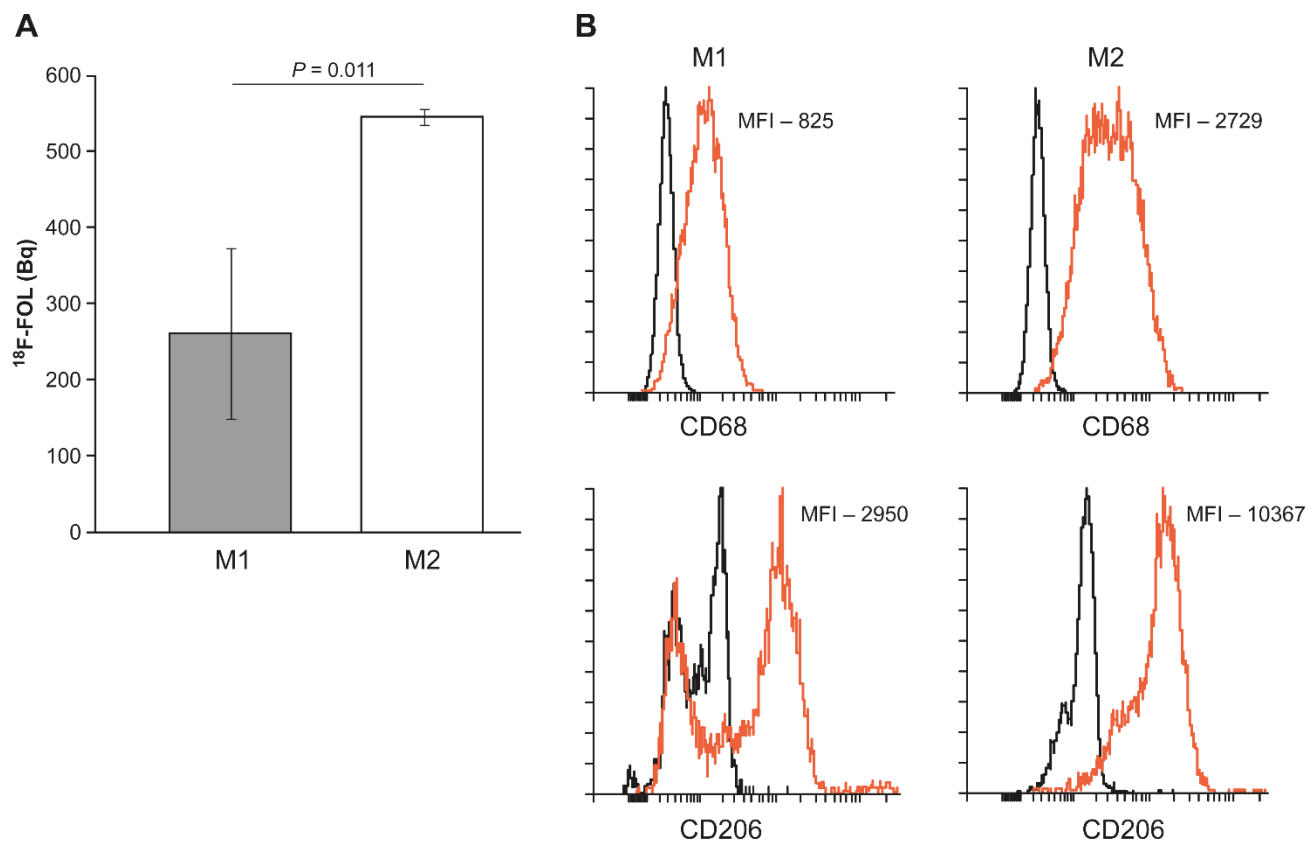

**Figure S1.  $^{18}\text{F}$ -FOL binds to macrophages derived from human blood monocytes.** (A) Binding of  $^{18}\text{F}$ -FOL on M1 macrophages (polarized with LPS and IFN- $\gamma$ ) and M2 macrophages (polarized with M-CSF, IL-4 and IL-10). Quantitative data are Becquerel (mean  $\pm$  standard deviation,  $n = 3$  triplicates). (B) Representative flow cytometric analyses of total CD68 (permeabilized cells) and surface CD206 (macrophage mannose receptor-1 [MRC-1]) from M1 and M2 macrophages. Black histograms are isotype controls and red histograms are for CD68 and CD206. MFI = mean fluorescence intensity.

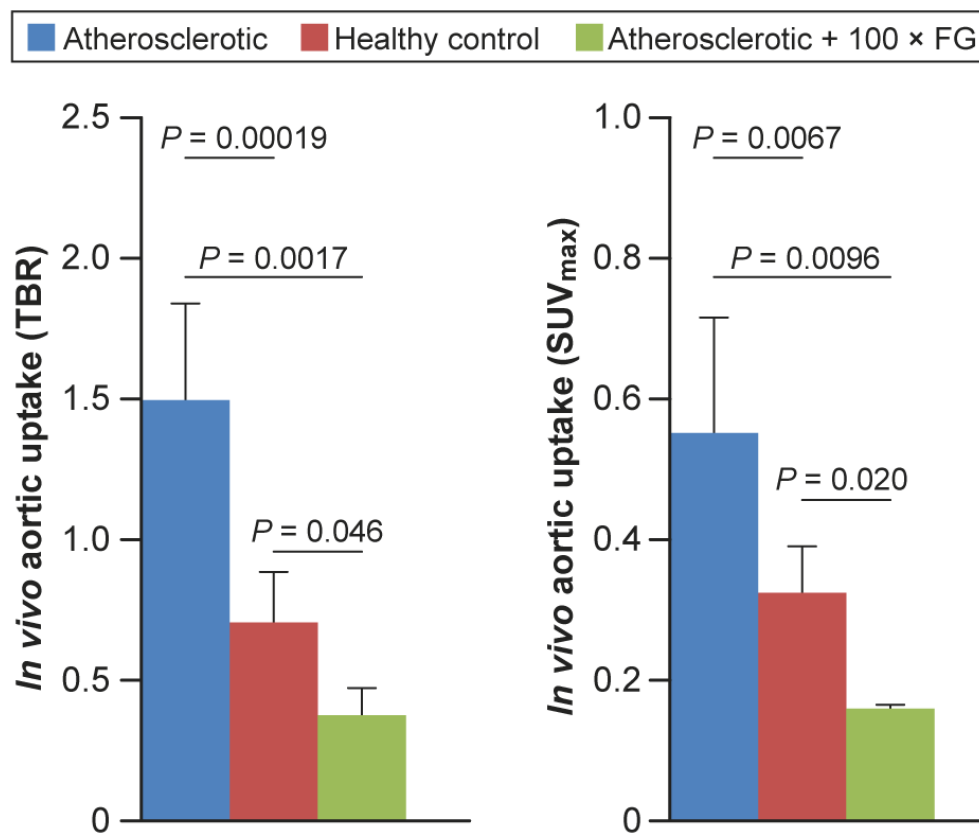

**Figure S2. Uptake of  $^{18}\text{F}$ -FOL in mice.** Uptake of  $^{18}\text{F}$ -FOL in aortic arches of atherosclerotic LDLR<sup>-/-</sup> ApoB<sup>100/100</sup> ( $n = 9$ ), healthy C57BL/6N controls ( $n = 6$ ), and atherosclerotic mice with a 100-fold molar excess of folate glucosamine (FG) ( $n = 3$ ), as assessed by *in vivo* PET/CT imaging. TBR = maximum target-to-background ratio, SUV<sub>max, aortic arch</sub>/SUV<sub>mean, blood</sub>. SUV<sub>max</sub> = maximum standardized uptake value determined at 60–90 min post  $^{18}\text{F}$ -FOL injection.

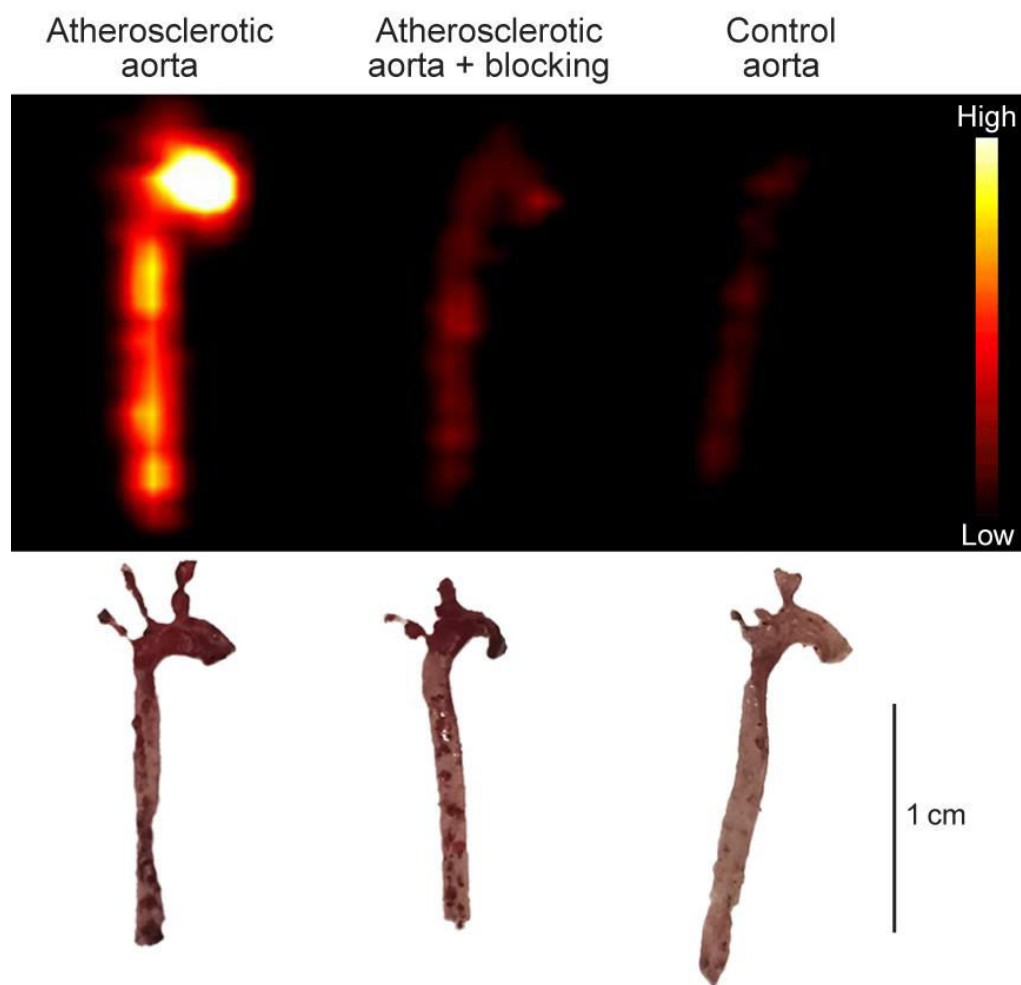

**Figure S3. Mouse aorta  $^{18}\text{F}$ -FOL PET.** *Ex vivo* obtained examples of  $^{18}\text{F}$ -FOL PET images (top) and photographs of the aortas stained with Oil-Red-O (bottom) from atherosclerotic  $\text{LDLR}^{-/-}\text{ApoB}^{100/100}$  mouse ( $n = 1$ ), atherosclerotic mouse with a 100-fold excess of folate glucosamine (blocking) ( $n = 1$ ), and healthy C57BL/6N control mouse ( $n = 1$ ).

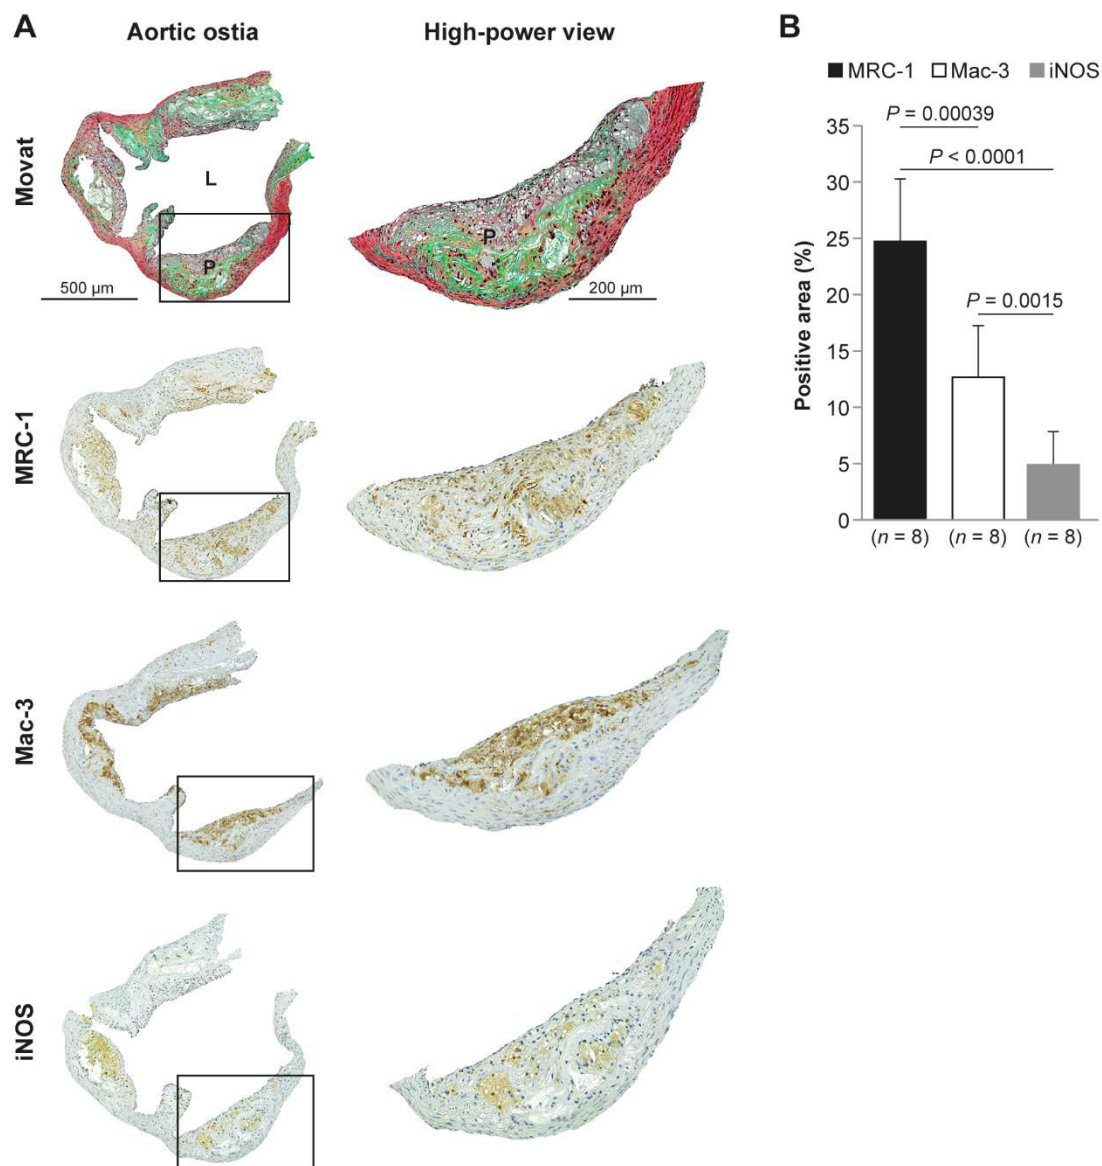

**Figure S4. Histology and immunohistochemistry of atherosclerotic lesions in  $LDLR^{-/-} ApoB^{100/100}$  mice.** (A) Representative aortic root sections were stained with Movat's pentachrome (black = nuclei; yellow = collagen, reticular fibers; blue = ground substance, mucin; bright red = fibrin; red = muscle) or with anti-mouse Mac-3 (macrophages), iNOS (M1 polarized macrophages) and MRC-1 (M2 polarized macrophages) immunohistochemistry. The high-power views are of the area within the black rectangle on the left images. Mac-3, iNOS and MRC-1 positive cells appear brown in color. L = lumen; P = plaque; W = healthy vessel wall. Please note that the Movat and Mac-3 images are the same as in

Figure 3D. (B) Quantitative results of immunohistochemistry for the detection of macrophage markers (mean  $\pm$  SD).

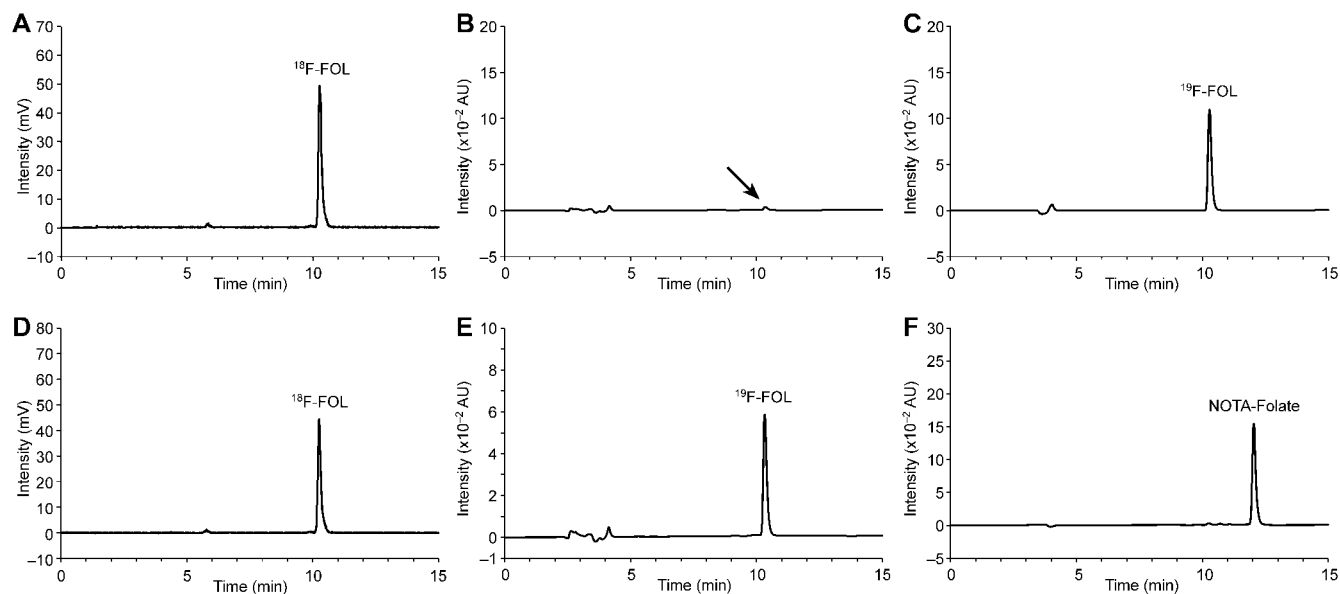

**Figure S5. Representative HPLC chromatograms of  $^{18}\text{F}$ -FOL, the reference  $^{19}\text{F}$ -FOL, and precursor NOTA-folate.** (A) Radioactivity and (B) UV detection of  $^{18}\text{F}$ -FOL (the UV peak [arrow] was low because of the high specific radioactivity of  $^{18}\text{F}$ -FOL), (C) UV detection of  $^{19}\text{F}$ -FOL, (D) radioactivity and (E) UV detection of  $^{18}\text{F}$ -FOL spiked with  $^{19}\text{F}$ -FOL, and (F) UV detection of NOTA-folate.

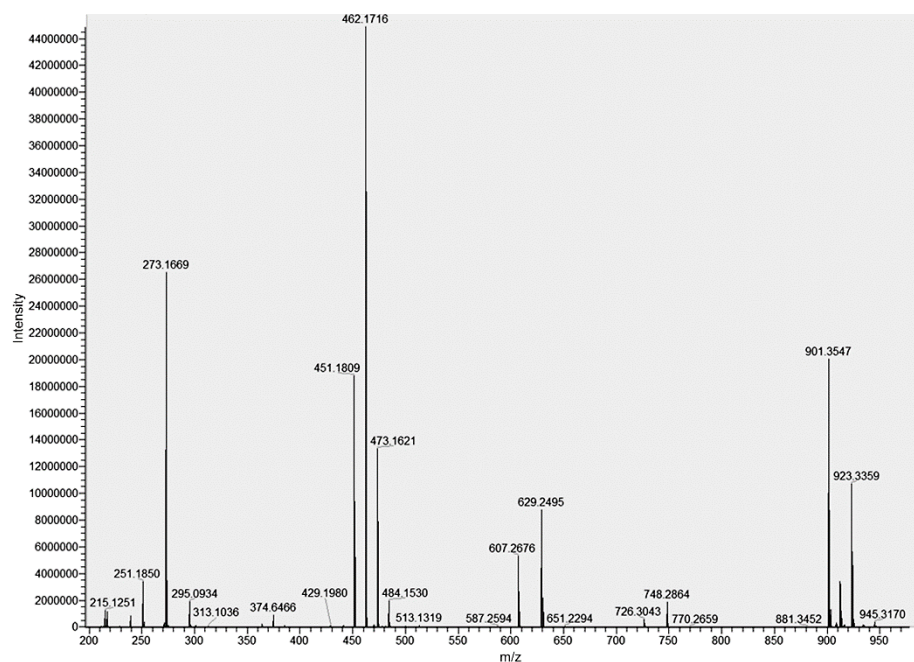

**Figure S6. High-resolution mass spectrometry analysis of  $^{19}\text{F}$ -FOL.** The theoretical monoisotopic mass for ion  $[\text{M}+\text{H}]^+$   $\text{C}_{37}\text{H}_{51}\text{AlFN}_{12}\text{O}_{12}$  was 901.3544 and the observed mass was 901.3547.
